# Supplementary material for: Dual RNA-Seq Uncovers Metabolic Amino Acids Dependency of the Intracellular Bacterium Piscirickettsia salmonis Infecting Atlantic Salmon
Source: Front Microbiol. 2018 Nov 27;9:2877. doi: 10.3389/fmicb.2018.02877 (PMC6277808; doi:10.3389/fmicb.2018.02877)
Supplement: Supplementary file 5 [file Table_2.XLSX]

## Sheet: Table S1
	Table S2. List of qPCR primers used for validation.
	Primer Name	Sequence 5' to 3'	Primer efficiency	Primer Name	Sequence 5' to 3'	Primer efficiency
	Piscirickettsia salmonis			Salmo salar
	BamA_F	CGGTTGATGGGCGTTGGT	102.3	ELF1a-F2	CCCCATCCCGCCCCACAGA	100.6
	BamA_R	GAACCAGACCAGCCACCAG		ELF1a-R2	GGGTTCCAGTCTCCACACGGC
	gatB_F	GTACCCGCACCGAAACTAAA	101.6	Ss_FerritinH_F2	TCTGAACACAACGACCCACA	98.4
	gatB_R	TGATGCCGCCAGATTCTAAT		Ss_FerritinH_R2	GTCAAACAGGTACTCGGCCA
	gltA_F	GATGTTTGGCTCCGCTGAAA	98.5	SS_FerritinM_F1	TATCACCACGATTGCGAAGC	98.6
	gltA_r	ACCGTTGATGTTGAGGCATTT		SS_FerritinM_R1	CTCGTCGCTGTTCTCCTTGA
	GroEL_F	GCTTTGGTGATCGTCGTAAAG	102.7	Ss_Hep_F	GCTGTTCCTTTCTCCGAGGTGC	102.4
	GroEL_R	AGCCAACTTCTTCAGAGATTAC		Ss_Hep_R	GTGACAGCAGTTGCAGCACCA
	HtpG_F	TGGGCTCAATTTGGTCGTGT	99.1	Ss_Transf_Recp_F2	CAGAGTCTGTAGCAGTGCCA	98.7
	HtpG_R	ACCGTCTGTGTTTCTGTCCC		Ss_Transf_Recp_R2	AGTGAGAAGCCAAACCGTGT
	IcmL_F	GCCGATTGTTGAGAAGATACGTGATAA	97.5	Ss_IR2_F2	GTTCAATTCATACGGCGCCC	103.2
	IcmL_R	ACTTGCAAACGCCAGCTGTATA		Ss_IR2_R2	GCCTCAAACACGTCCAGAGT
	IcmW_F	TGCCGAGGTATTAGAGTATGCA	103.6	SS_ALAs_F	GGTAGGATGCCTGCTGACTG	98.9
	IcmW_R	CCGCAGGCAACGAATTCATTA		SS_ALAs_R	CCCCAAGCCTGTTTTGCTGA
	RS03170_F	GGGTCGGGGCGATTGATTAT	98.3	SS_ALAd_F	CCACTCGCCCATCCATCATA	101.8
	RS03170_R	CAGGGTGAAACTGTACGCCA		SS_ALAd_R	ACACCTCACATGGACACTGT
	RS06335_F	CGCTGGATATGGGTTCGACA	102.5	SS_HO_F	TCCTCCTCCTCCAGCTCTATG	104.1
	RS06335_R	TGTTGTTGGAAACCTGTGGC		SS_HO_R	ACAAGTCCTTGGCCGCATTA
	VirB9_F	ATGGATGGTGCCTCGTATGC	97.8	SS_CPOX_F	CTGCGTCTCCATCAGCA	97.9
	VirB9_R	TGCCGCTTGTGAGATCAACT		SS_CPOX_R	GCATCGGTGATCCCCAAAAC
